# Supplementary figures and images for: Spatiotemporal dynamics of multi-vesicular release is determined by heterogeneity of release sites within central synapses
Source: eLife journal article supplement (doi:10.7554/elife.55210), 2020-02-06

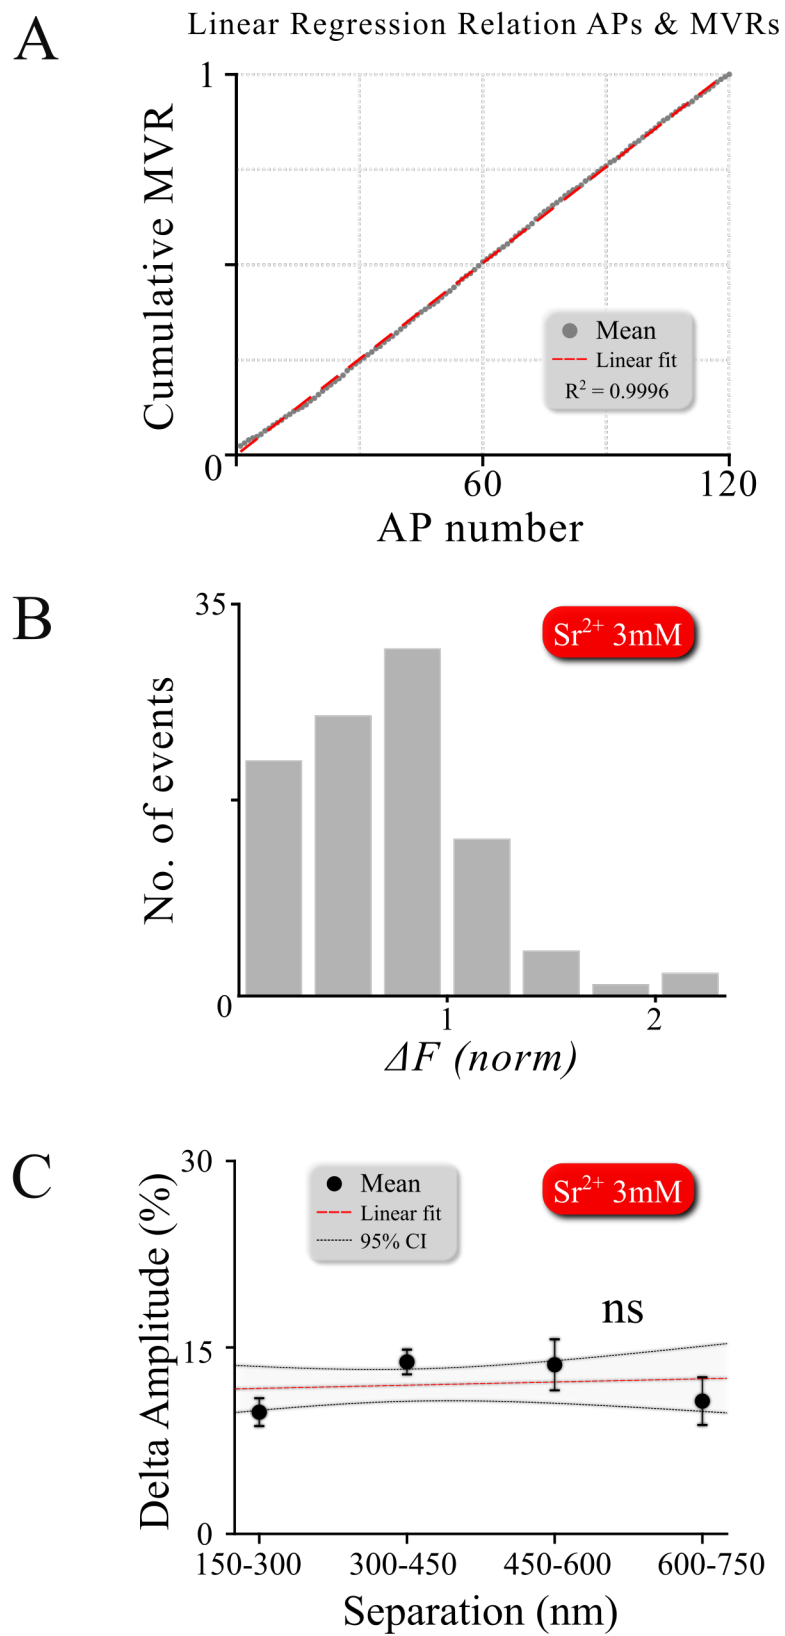

Figure 3 Supplement 2

Supplement: supp [file elife-55210-supp-v1.zip]

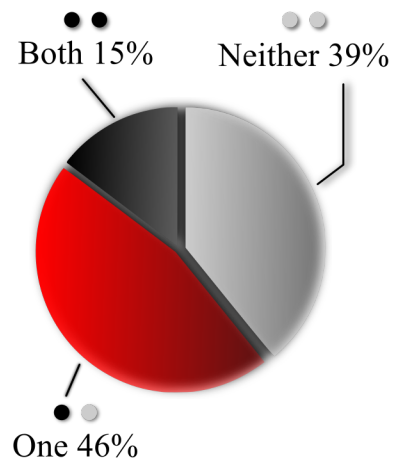

Figure 1 Supplement 1

Supplement: supp [file elife-55210-supp-v1.zip]

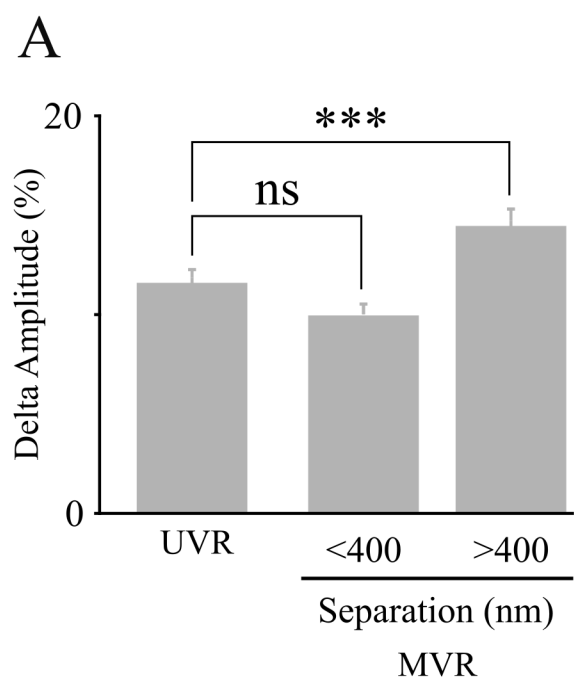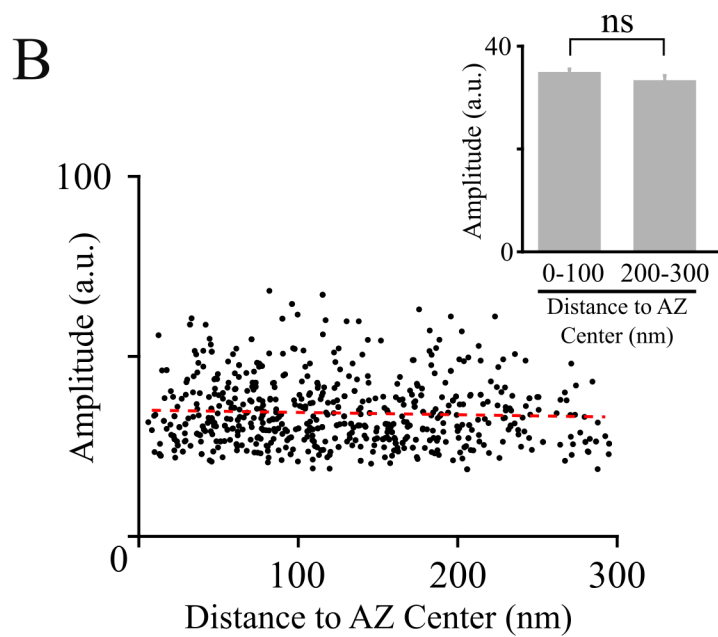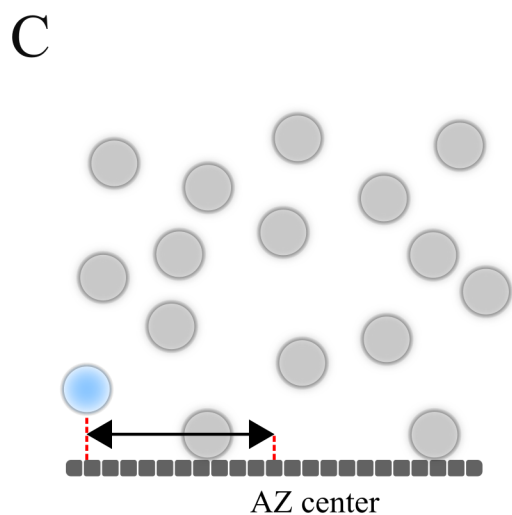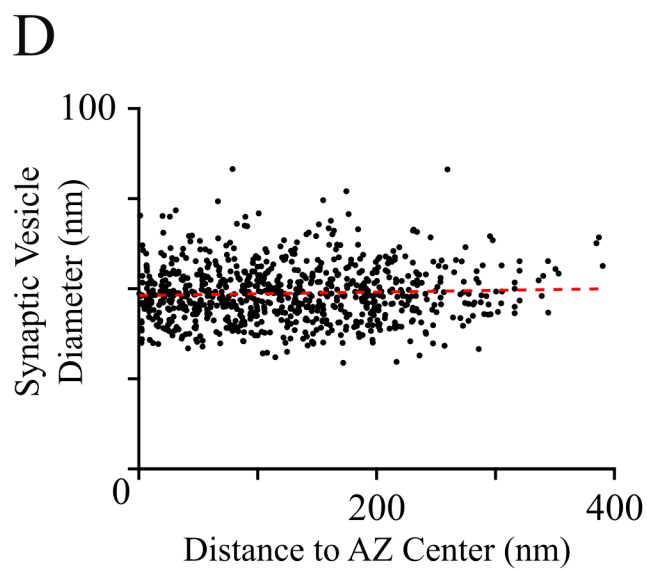

Figure3 Supplement 1

Supplement: supp [file elife-55210-supp-v1.zip]

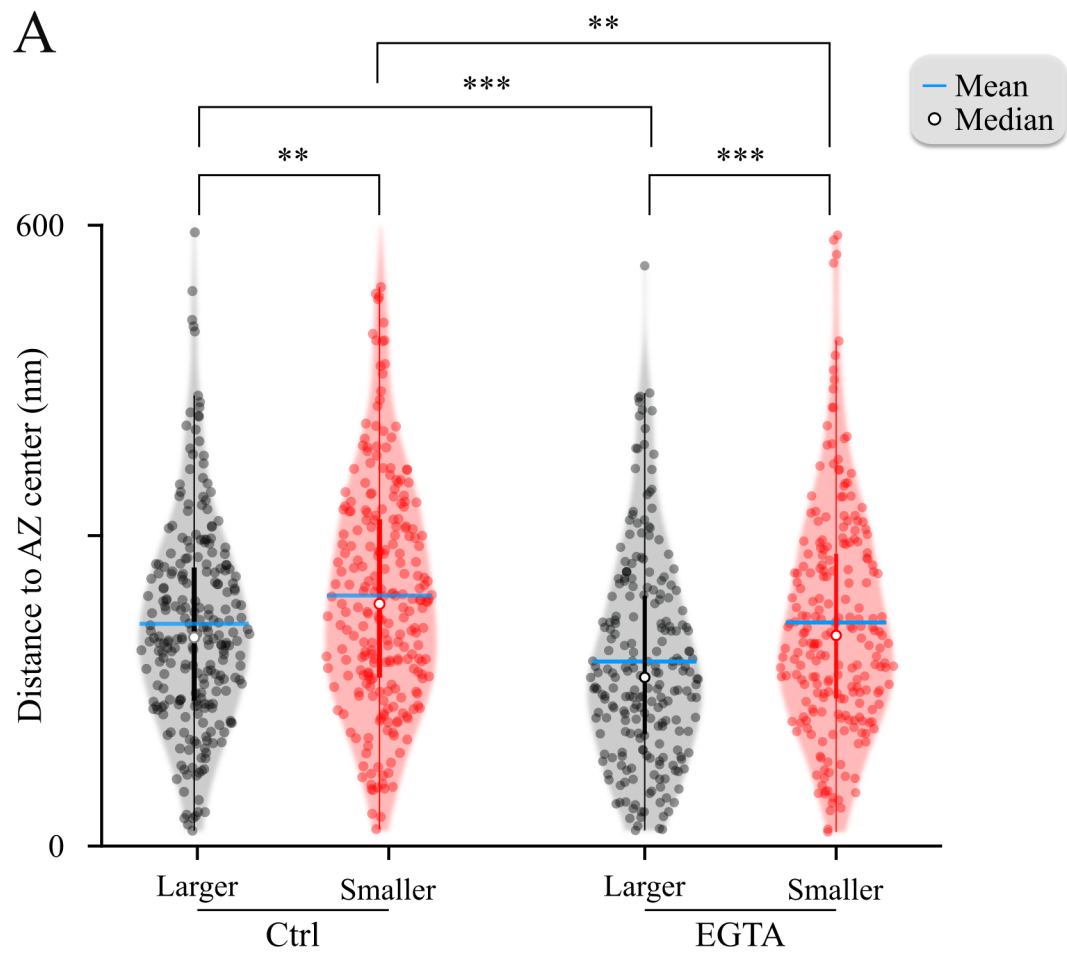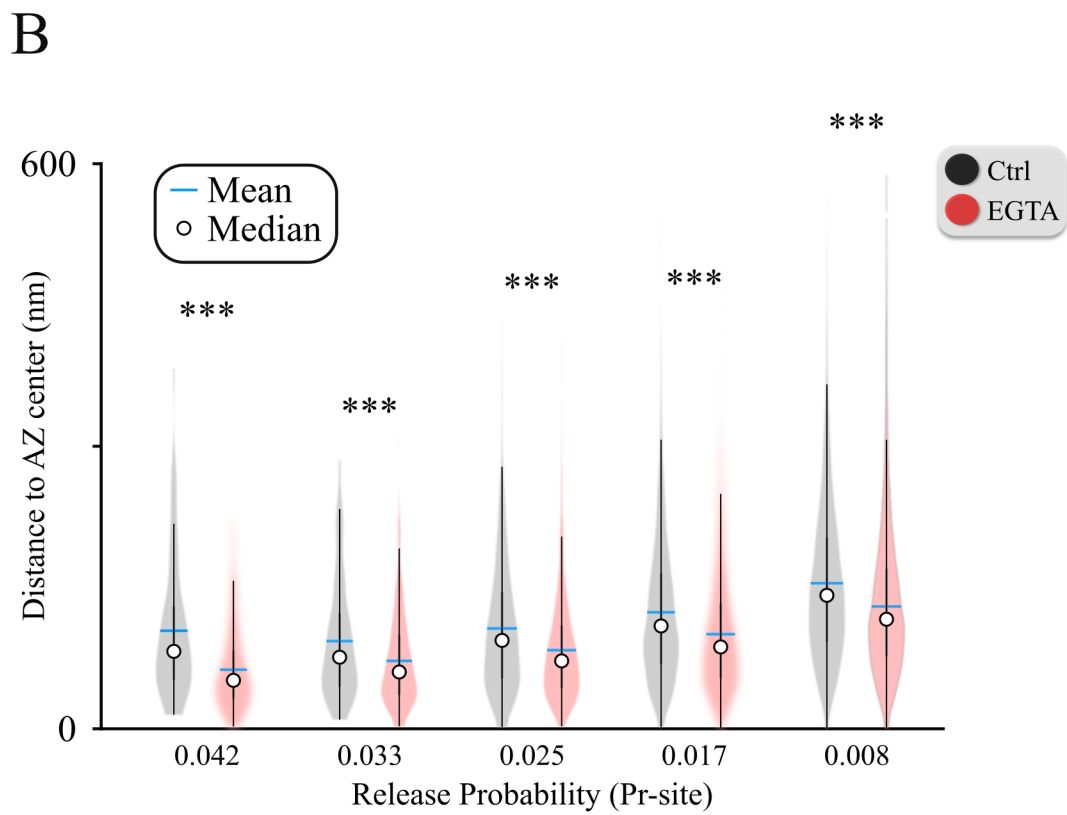

Figure 4 Supplement 1

Supplement: supp [file elife-55210-supp-v1.zip]
